# Supplementary material
Source: ML conference proceedings conference paper supplement (https://openreview.net/forum?id=Nlsr4DepNt)
Supplement: supplementary_material [file attachment]

## A T-SNE visualization

To visually validate the ability of separating different classes in FixMatch and our method, we observe T-SNE results of their feature representation during the training process. The results are shown in Figure 1 2. Due to the lack of labeled samples, FixMatch is difficult to distinguish samples from different categories during the training process (*i.e.*, 1-st to 200-th epoch). We notice that, in FixMatch, only imposing the consistent constraint causes the samples gradually being closer together as shown in Figure 1. On the contrary, by mining the super-class relation between samples, our method can escape from this dilemma with more informative representations in Figure 2. In the early stage of training, although only a small part of the categories could be distinguished, with the refinement of the super-class, more categories of samples will be gradually distinguished in the later training process.

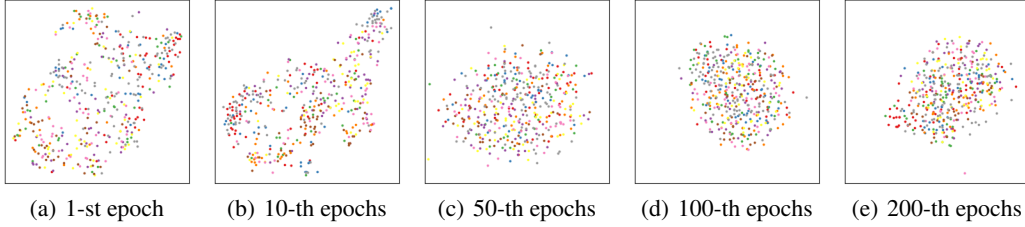

Figure 1: Feature visualization of FixMatch in the training process (CIFAR-10 with 10 labels)

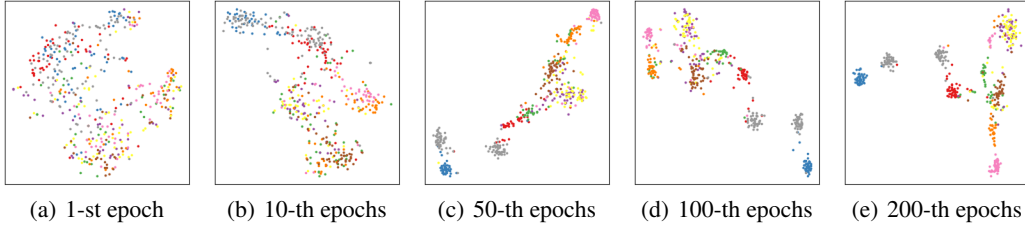

Figure 2: Feature visualization of our method in the training process (CIFAR-10 with 10 labels)

## B Why the progressive form of the super-class is important

In our method, at the beginning of training process, when the number of super-classes is relative small, the learning of discriminative information is safe and reliable. However, with the training process, the performance will be largely limited by this small number of super-classes. Here, we provide proofs from an perspective of information amount.

**Theorem 1.** Given the number  $K$  of super-class and dataset  $\mathcal{D}$ , the upper bound of information amount produced by dividing the samples of  $\mathcal{D}$  into super-classes is  $|\mathcal{D}| \log_2 K$ .

**Proof 1.** Assuming that each sample  $u_i \in \mathcal{D}$  is a signal source, when the information amount becomes its theoretical largest value, the entropy is also up to its largest value (*i.e.*,  $u_i$  belongs to each super-class with equal probability). Then the upper bound of information amount produced from  $u_i$  is:

$$\sup H(u_i) = - \sum_{i=1}^K \frac{1}{K} \log_2 \frac{1}{K} = \log_2 K,$$

where  $K$  is the number of super-class. Then the upper bound of information amount produced from  $\mathcal{D}$  is:

$$\sup H(\mathcal{D}) = \sum_{i=1}^{|\mathcal{D}|} H(u_i) = |\mathcal{D}| \log_2 K$$

25 **C Hyperparameter setting**

We show the detailed hyperparameters setting for each dataset in table 1.

Table 1: The detailed hyperparameter setting in our method

|                 | CIFAR-10   | CIFAR-100   | STL-10     |
|-----------------|------------|-------------|------------|
| Learning Rate   |            | 0.03        |            |
| SGD Momentum    |            | 0.9         |            |
| EMA Momentum    |            | 0.99        |            |
| Batch Size      |            | 64          |            |
| $\tau_1$        |            | 0.95        |            |
| $\tau_2$        |            | 0.8         |            |
| $\lambda_{con}$ |            | 1           |            |
| $\lambda_{dis}$ |            | 1           |            |
| Net             | WRN-28-2   | WRN-28-8    | ResNet-18  |
| Weight Decay    | 5e-4       | 1e-3        | 5e-4       |
| Set of $K$      | {3, 5, 10} | {5, 10, 20} | {3, 5, 10} |
| $\alpha$        | 0.3        | 0.5         | 0.3        |

26
